# Supplementary material for: Heterogeneous solvent-metal-free aerobic oxidation of alcohol under ambient conditions catalyzed by TEMPO-functionalized porous poly(ionic liquid)s
Source: Royal Society of Chemistry journal article supplement (doi:10.1039/d4ra02241f), 2024-01-01
Supplement: d4ra02241f1.pdf [file d4ra02241f1.pdf]

# Supporting Information

## Heterogeneous solvent-metal-free aerobic Oxidation of alcohol under ambient condition catalyzed by TEMPO-functionalized porous poly(ionic liquid)s

Yaping She <sup>a</sup>, Xinyu Chen<sup>a</sup>, Mengya Wang<sup>a</sup>, Anqiu Liu<sup>\*a</sup>, Xiaochen Wang<sup>\*a</sup>, Daming Gao<sup>a</sup>, Kunhong Hu<sup>a</sup> and Miao Hu<sup>a</sup>

<sup>a</sup>School of Energy Materials and Chemical Engineering, Hefei University, Hefei 230601, China

### Corresponding Authors

\* Tel: +86-551-62158395

E-mail: liuaq@hfu.edu.cn (A. Liu); wxc@hfu.edu.cn (X. Wang)

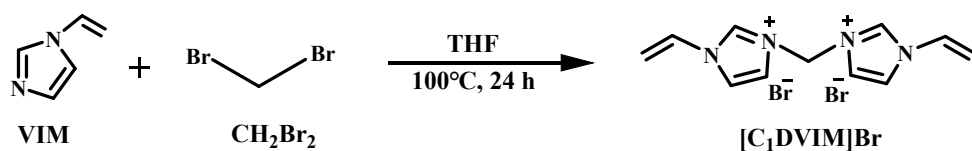

**Scheme S1** Synthesis of rigid bis-vinylimidazolium salt monomer [C<sub>1</sub>DVIM]<sup>+</sup>Br<sup>-</sup>.

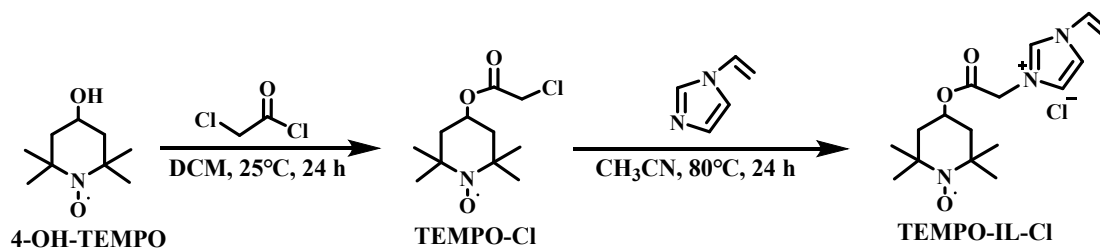

**Scheme S2** Synthesis of TEMPO functionalized ionic liquid monomer TEMPO-IL-Cl.

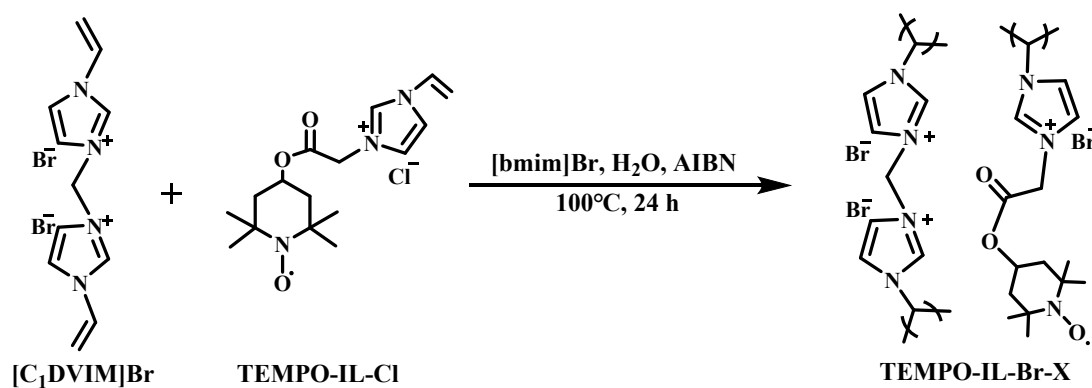

**Scheme S3** Synthetic route of TEMPO-IL-Br-X. (X is the molar ratio of TEMPO-IL-Cl to [C<sub>1</sub>DVIM]<sup>+</sup>Br<sup>-</sup>, X=1, 0.5, 0.2, 0.1)

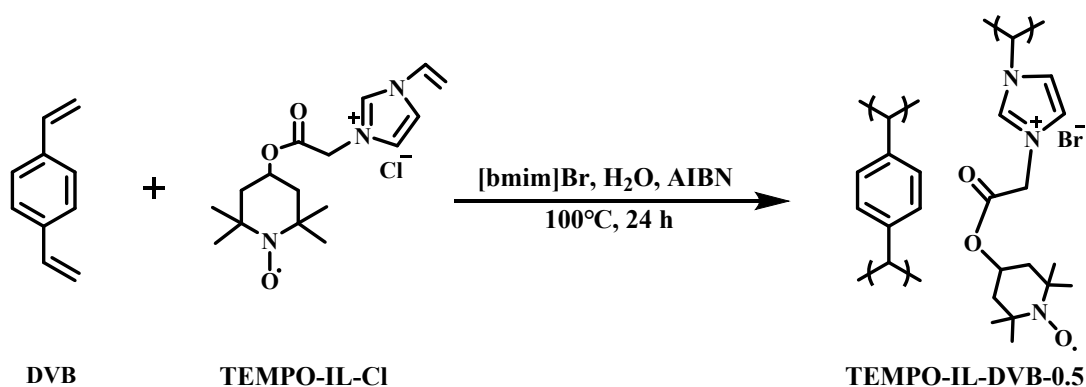

**Scheme S4** Synthetic route of TEMPO-IL-DVB-0.5.

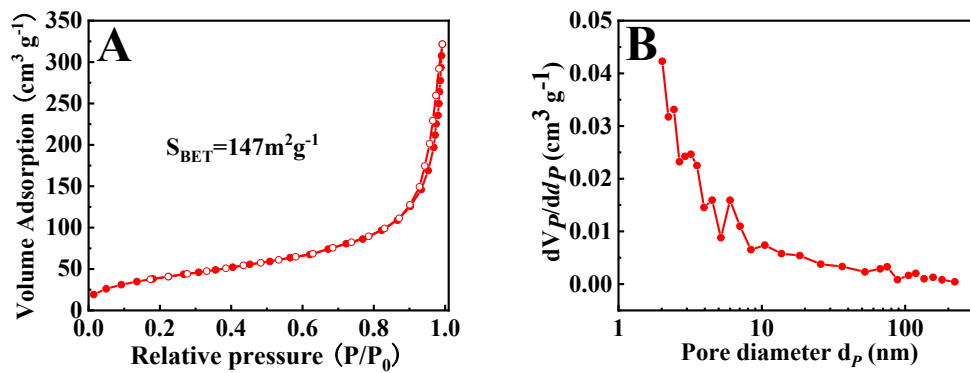

**Fig. S1** (A) Nitrogen sorption isotherms and (B) pore size distribution curve of TEMPO-IL-DVB-0.5.

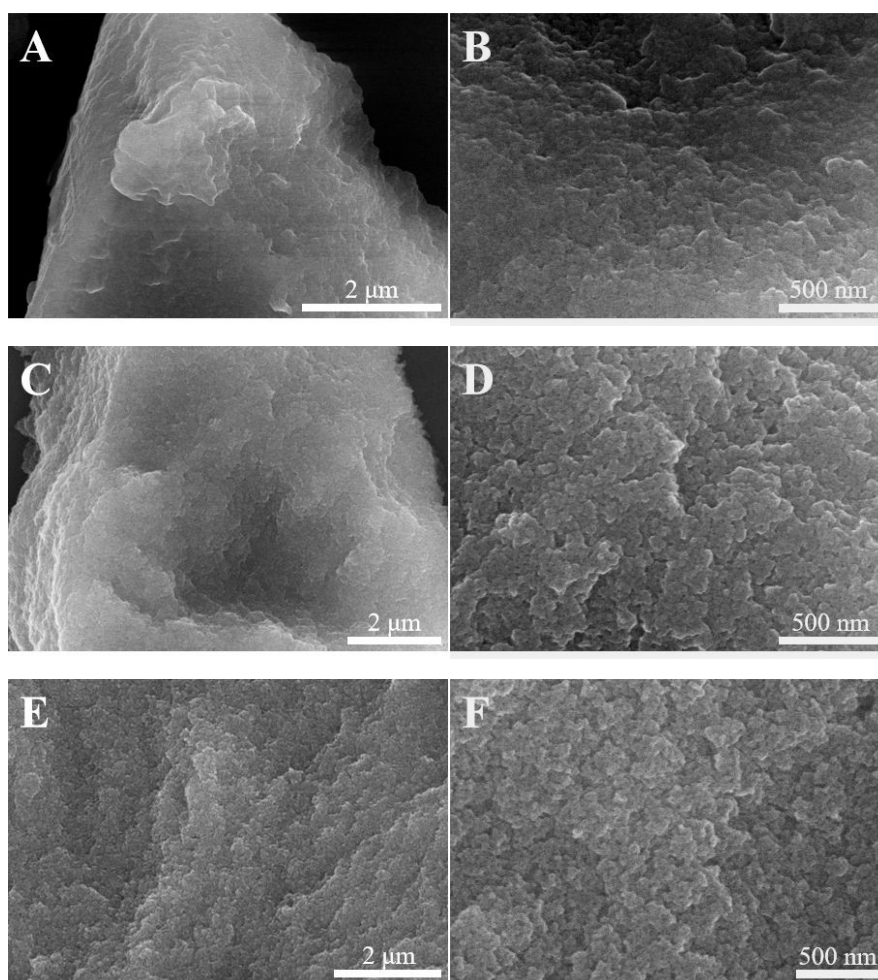

**Fig. S2** SEM images of (A, B) TEMPO-IL-Br-1, (C, D) TEMPO-IL-Br-0.2, and (E, F) TEMPO-IL-Br-0.1.

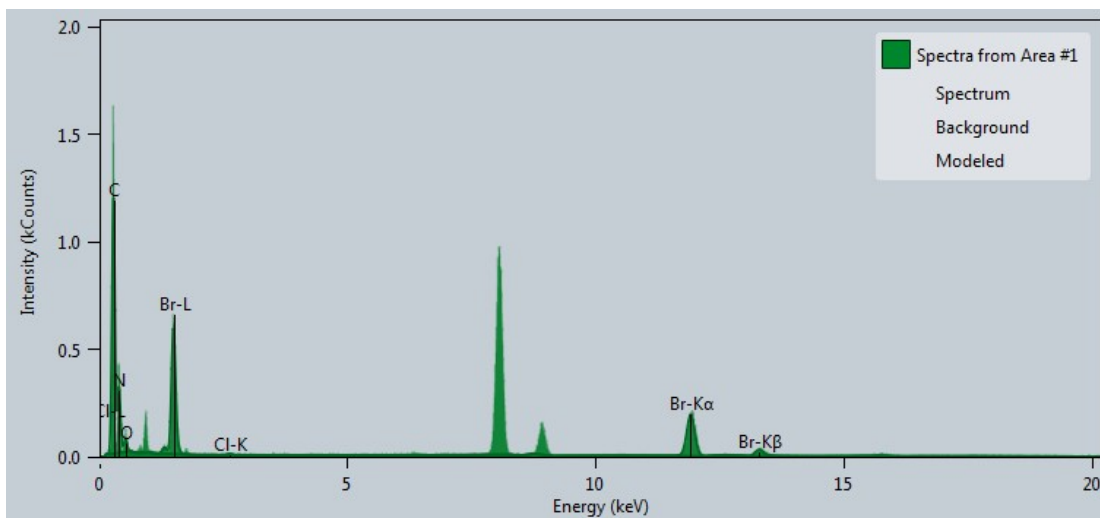

Fig. S3 EDS spectrum of TEMPO-IL-Br-0.5.

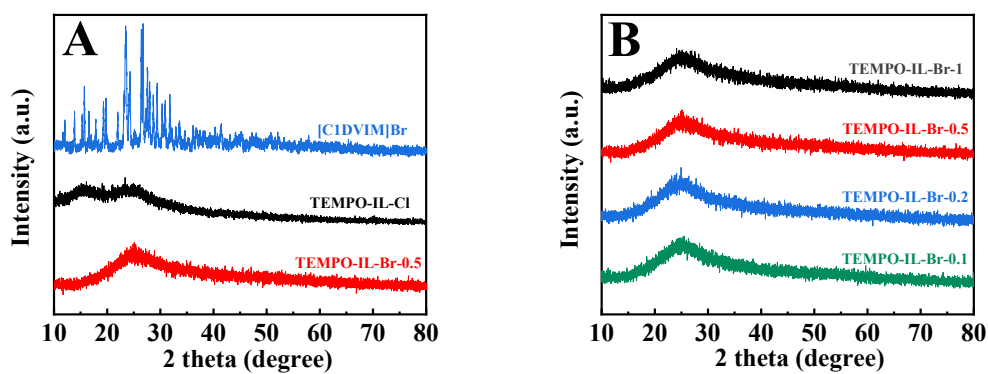

Fig. S4 XRD patterns of [C<sub>1</sub>DVM]Br, TEMPO-IL-Cl and TEMPO-IL-Br-X (X=1, 0.5, 0.2, 0.1).

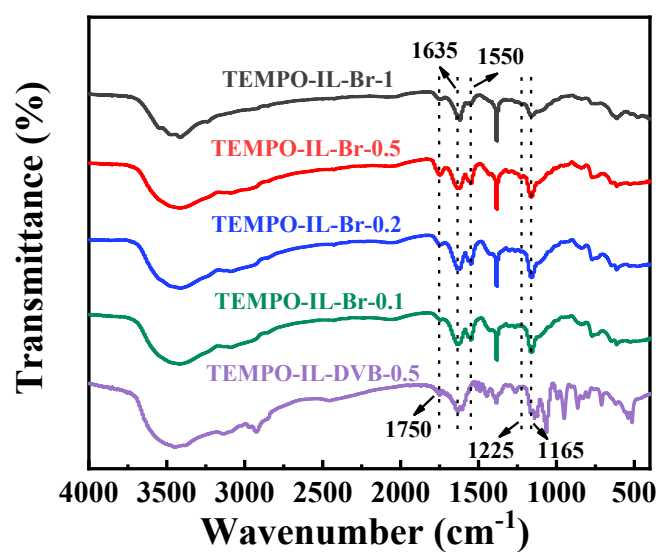

Fig. S5 FT-IR spectra of TEMPO-IL-Br-X (X=1, 0.5, 0.2, 0.1) and TEMPO-IL-DVB-0.5.

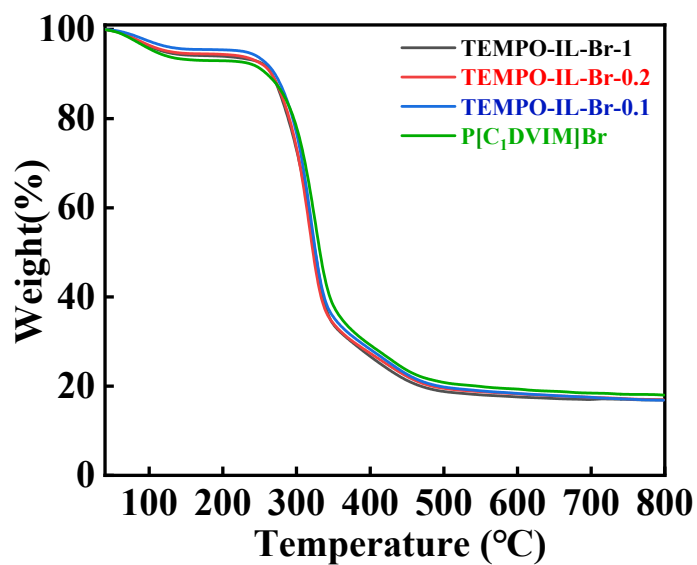

Fig. S6 Thermogravimetry curves of P[C<sub>1</sub>DVIM]Br and TEMPO-IL-Br-X (X=1, 0.2, 0.1).

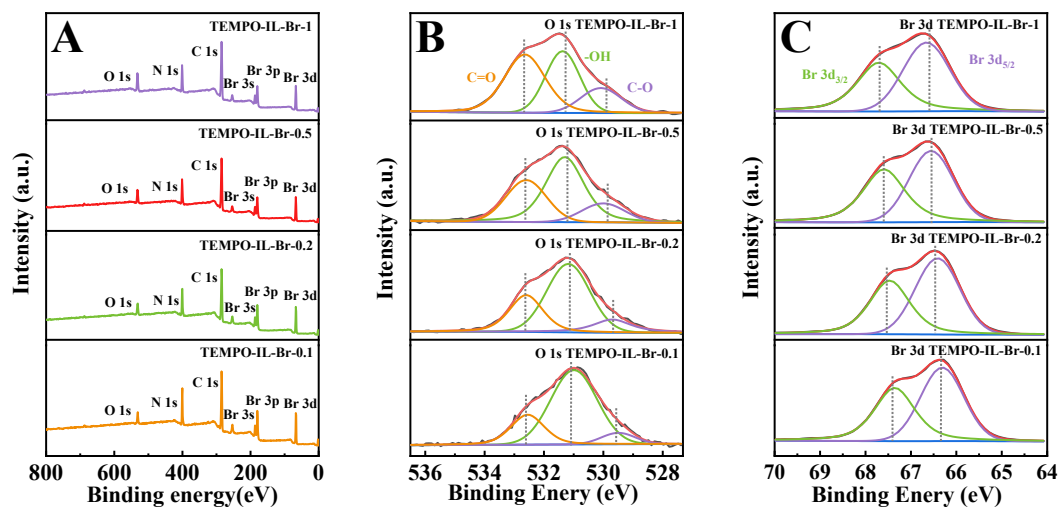

Fig. S7 (A) XPS survey scan spectra, (B) O 1s and (C) Br 3d XPS spectra of TEMPO-IL-Br-X (X=1,0.5,0.2,0.1).

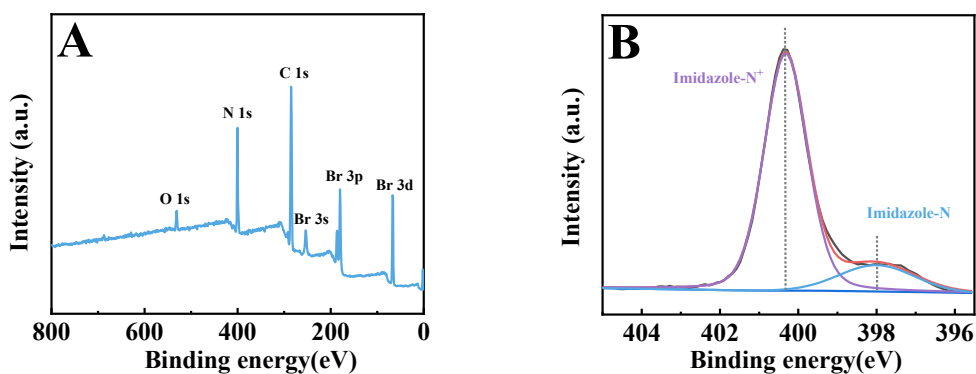

Fig. S8 (A) XPS survey scan spectrum and (B) N 1s XPS spectrum of P[C<sub>1</sub>DVIM]Br.

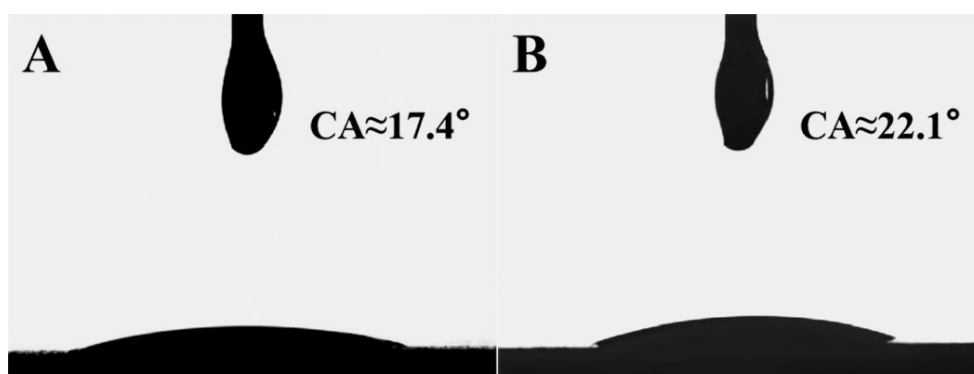

Fig. S9 Benzyl alcohol contact angle on a thin slice of (A) TEMPO-IL-Br-0.5 and (B) TEMPO-IL-DVB-0.5.

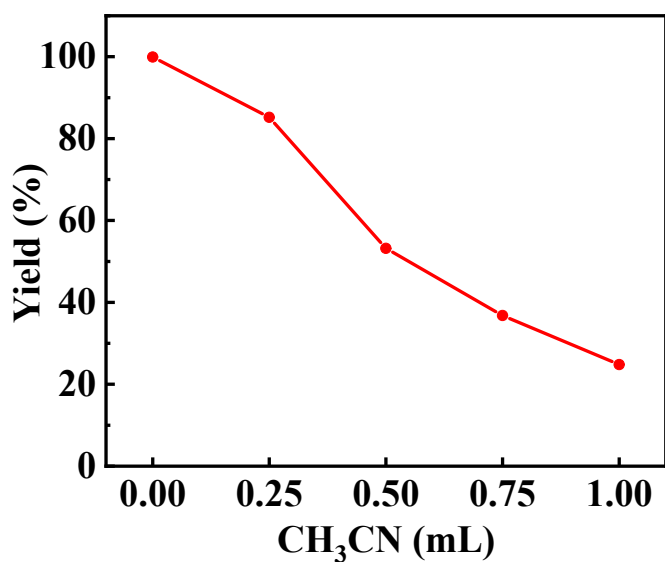

Fig. S10 Effect of CH<sub>3</sub>CN dosage on the oxidation of benzyl alcohol.

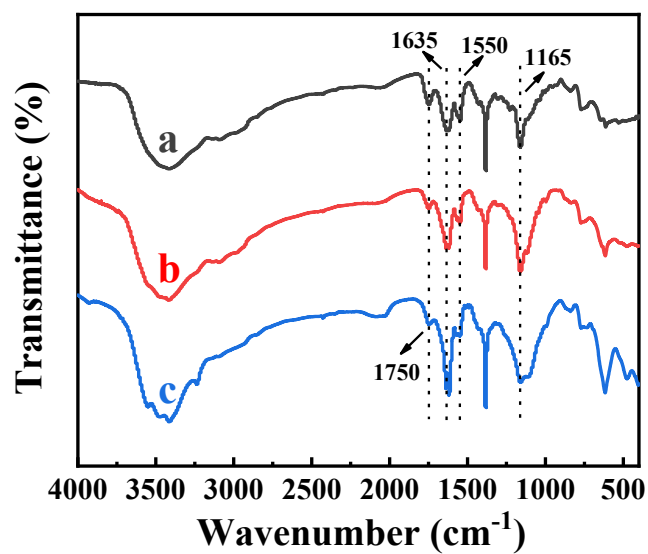

**Fig. S11** FT-IR spectra of (a) fresh TEMPO-IL-Br-0.5, (b) recovered TEMPO-IL-Br-0.5 in CH<sub>3</sub>CN and (c) recovered TEMPO-IL-Br-0.5 without solvent.

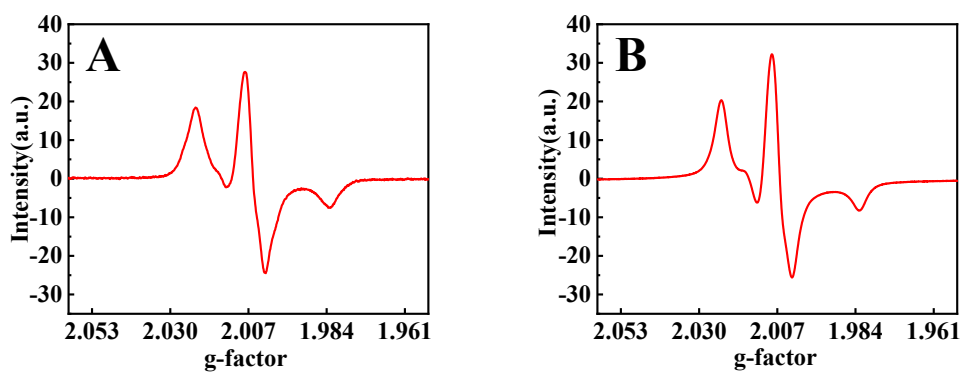

**Fig. S12** Solid state EPR spectra of TEMPO-IL-Br-0.5 recovered in (A) solvent-free and (B) CH<sub>3</sub>CN.

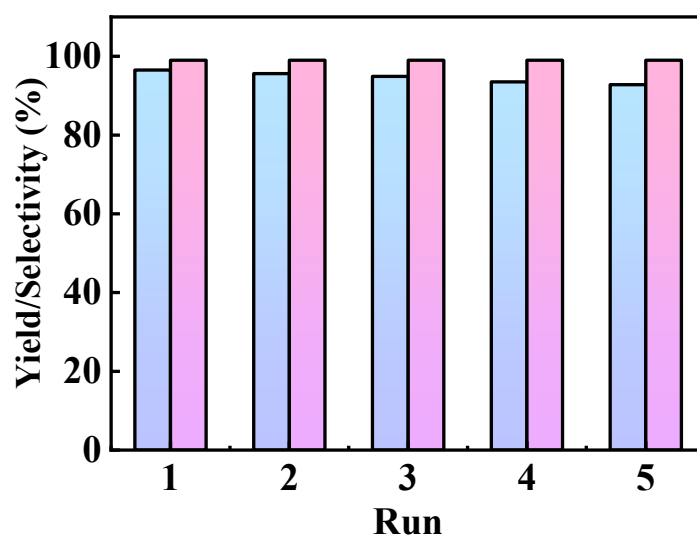

Fig. S13 Recyclability study of TEMPO-IL-Br-0.5 in CH<sub>3</sub>CN for the oxidation of benzyl alcohol.

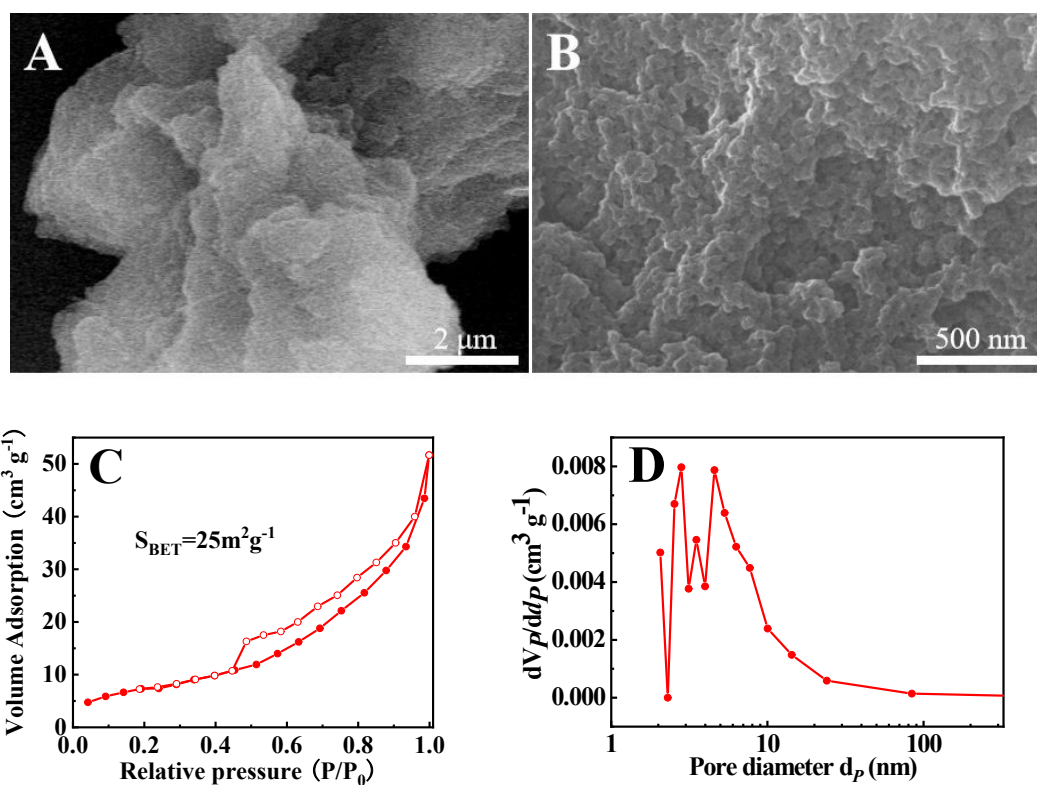

Fig. S14 (A, B) SEM images, (C) Nitrogen sorption isotherms and (D) pore size distribution curve of recovered TEMPO-IL-Br-0.5.



Table S1

The proportional relation of chemical component in the final copolymers.

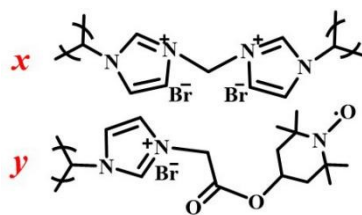

| Entry | Samples         | x: y      |
|-------|-----------------|-----------|
| 1     | TEMPO-IL-Br-1   | 1 : 1.147 |
| 2     | TEMPO-IL-Br-0.5 | 1 : 0.736 |
| 3     | TEMPO-IL-Br-0.2 | 1 : 0.479 |
| 4     | TEMPO-IL-Br-0.1 | 1 : 0.250 |

Table S2

Elemental analysis data of different samples.

| Entry | Samples                 | Nitrogen(%) | Carbon(%) | Hydrogen(%) |
|-------|-------------------------|-------------|-----------|-------------|
| 1     | TEMPO-IL-Cl             | 11.11       | 51.34     | 7.36        |
| 2     | [C <sub>1</sub> DVIM]Br | 15.53       | 36.85     | 3.99        |
| 3     | TEMPO-IL-Br-1           | 12.92       | 38.83     | 5.08        |
| 4     | TEMPO-IL-Br-0.5         | 13.43       | 37.95     | 5.32        |
| 5     | TEMPO-IL-Br-0.2         | 13.9        | 35.85     | 5.21        |
| 6     | TEMPO-IL-Br-0.1         | 14.49       | 35.97     | 5.21        |
| 7     | TEMPO-IL-Br-r           | 13.63       | 37.48     | 5.57        |
| 8     | TEMPO-IL-DVB-0.5        | 3.05        | 78.57     | 7.51        |

TEMPO loading of TEMPO-IL-DVB-0.5 based on CHN analysis:

$$\frac{3.05\text{mg N}}{100\text{mg Sample}} \times \frac{1\text{mmol N}}{14\text{mg N}} \times \frac{1\text{mmol TEMPO}}{3\text{mmol N}} \times \frac{1000\text{mg Sample}}{1\text{g Sample}} = 0.726\text{mmol/g}$$

**Table S3**The aerobic oxidation of benzyl alcohol under various conditions.<sup>a</sup>

| Entry | Solvent(ml)      | Con. <sup>b</sup> (%) | Sel. <sup>b</sup> (%) | Yield <sup>b</sup> (%) |
|-------|------------------|-----------------------|-----------------------|------------------------|
| 1     | MeOH             | 3.4                   | 8.4                   | 0.3                    |
| 2     | EtOH             | 8.2                   | 40.0                  | 3.3                    |
| 3     | H <sub>2</sub> O | 9.8                   | 95.1                  | 9.3                    |
| 4     | THF              | 42.1                  | 98.6                  | 41.5                   |
| 5     | EtOAc            | 58.6                  | 73.9                  | 43.3                   |
| 6     | Toluene          | 50.1                  | 99.0                  | 49.6                   |
| 7     | N-hexane         | 72.0                  | 99.1                  | 71.4                   |
| 8     | DCM              | 77.7                  | 99.8                  | 77.5                   |
| 9     | MeCN             | 85.2                  | 99.9                  | 85.1                   |
| 10    | none             | 99.9                  | 99.9                  | 99.9                   |

<sup>a</sup> Reaction conditions: 1.0 mmol of alcohol, 13.0 mg of TEMPO-IL-Br-0.5 (1.5 mol% of nitroxide radical), 5.5 mg of NaNO<sub>2</sub> (8.0 mol%), and 4.4 μL of H<sub>2</sub>SO<sub>4</sub> (8.0 mol%) in 0.25 mL of solvent with an O<sub>2</sub> balloon at 25°C.

<sup>b</sup> Determined by GC.

**Table S4**The aerobic oxidation of benzyl alcohol in the presence of different acid.<sup>a</sup>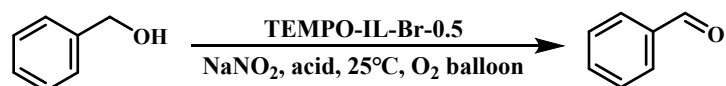

| Entry | Acid (mol%)                        | Con. <sup>b</sup> (%) | Sel. <sup>b</sup> (%) |
|-------|------------------------------------|-----------------------|-----------------------|
| 1     | -                                  | 0                     | -                     |
| 2     | HOAc(8)                            | 9.3                   | >99                   |
| 3     | HNO <sub>3</sub> (8)               | 66.2                  | >99                   |
| 4     | HCl(8)                             | 96.5                  | >99                   |
| 5     | H <sub>2</sub> SO <sub>4</sub> (8) | 99.9                  | >99                   |

<sup>a</sup> Reaction conditions: 1.0 mmol of benzyl alcohol, 13.0 mg TEMPO-IL-Br-0.5(1.5 mol% of nitroxide radicals), 5.5 mg of NaNO<sub>2</sub> (8.0 mol%) with an O<sub>2</sub> balloon at 25°C for 5h.

<sup>b</sup> The Conversion and selectivity were determined by GC.

**Table S5**Recovery performance of TEMPO-IL-Br-0.5 under solvent-free conditions.<sup>a</sup>

| Entry          | TBAB (mol%) | Yield (%) <sup>c</sup> |
|----------------|-------------|------------------------|
| 1              | 0           | 30                     |
| 2 <sup>b</sup> | 6           | 91                     |

<sup>a</sup> Reaction conditions: 1 mmol of alcohol, 13.0 mg of TEMPO-IL-Br-0.5 (1.5 mol% of nitroxide radical), 5.5 mg of NaNO<sub>2</sub> (8.0 mol%), and 4.4 μL of H<sub>2</sub>SO<sub>4</sub> (8.0 mol%) with an O<sub>2</sub> balloon at 25°C.

<sup>b</sup> Reaction conditions: 0.5 mmol of alcohol, 9.7 mg TBAB (6%) and all other conditions remained the same.

<sup>c</sup> Determined by GC.

<sup>d</sup> Wash with HAc, MeCN, and DCM for 0.5 h respectively.

**Table S6**

Comparison of catalysis performance for various TEMPO-anchored materials.

| Entry | Catalyst (mol%)                   | Conditions                                                                                   | Solvent                                       | Temp (°C) | Yield (%) | TOF <sup>a</sup> (h <sup>-1</sup> ) | Ref.      |
|-------|-----------------------------------|----------------------------------------------------------------------------------------------|-----------------------------------------------|-----------|-----------|-------------------------------------|-----------|
| 1     | TEMPO-IL-Br-0.5 (1.5)             | NaNO <sub>2</sub> , H <sub>2</sub> SO <sub>4</sub> , O <sub>2</sub> , 5 h                    | -                                             | 25        | >99       | >13.3                               | This work |
| 2     | FRPCP (3.5)                       | TBN, O <sub>2</sub> , 24 h                                                                   | C <sub>2</sub> D <sub>2</sub> Cl <sub>4</sub> | 80        | 94        | 1.1                                 | 1         |
| 3     | PEG-TEMPO (5)                     | Mn(NO <sub>3</sub> ) <sub>2</sub> , Co(NO <sub>3</sub> ) <sub>2</sub> , O <sub>2</sub> , 3 h | AcOH                                          | 25        | >99       | 6.7                                 | 2         |
| 4     | silica-supported TEMPO (20)       | NO <sup>+</sup> BF <sub>4</sub> <sup>-</sup> , O <sub>2</sub> , 4 h                          | DCM                                           | 25        | 97        | 1.2                                 | 3         |
| 5     | NMI-TEMPO-1 (5)                   | CuI, <sup>t</sup> Bu <sub>2</sub> -bipy, air, 3 h                                            | CH <sub>3</sub> CN                            | 25        | 96        | 6.4                                 | 4         |
| 6     | UiO-67-TEMPO(38%) (1)             | TBN, durene, O <sub>2</sub> , 24 h                                                           | DCE                                           | 25        | >99       | 4.2                                 | 5         |
| 7     | UiO-68-TEMPO (5)                  | TBN, air, 8 h                                                                                | DCE+H <sub>2</sub> O                          | 80        | >99       | 2.5                                 | 6         |
| 8     | iGO-TEMPO (1)                     | NaNO <sub>2</sub> , O <sub>2</sub> , 20 h                                                    | DCM+ACOH                                      | 25        | >99       | 5                                   | 7         |
| 9     | HPAF-TEMPO (5)                    | TBN, air, 6 h                                                                                | PhCF <sub>3</sub>                             | 80        | 96        | 3.3                                 | 8         |
| 10    | IL/SMNP (50)                      | 2 atm O <sub>2</sub> , 5 h                                                                   | toluene                                       | 80        | 97        | 0.4                                 | 9         |
| 11    | PAES-TEMPO/NO <sub>x</sub> (15.7) | air, 6 h                                                                                     | DCM                                           | 25        | >99       | 1.1                                 | 10        |
| 12    | MIL-101(Fe)/TEMPO-IsoNTA (5)      | TBN, O <sub>2</sub> , 1.5 h                                                                  | PhCF <sub>3</sub>                             | 80        | >99       | 13.3                                | 11        |
| 13    | IL@SBA-15-TEMPO (1)               | TBN, O <sub>2</sub> , 3.5 h                                                                  | AcOH                                          | 40        | >99       | 28.6                                | 12        |
| 14    | MNS-TEG-IL-TEMPO (0.9)            | TBN, HNO <sub>3</sub> , O <sub>2</sub> , 5 h                                                 | H <sub>2</sub> O                              | 50        | >99       | 22.2                                | 13        |
| 15    | TEMPO@PMO-IL-Br (1.5)             | TBN, ACOH, O <sub>2</sub> , 1 h                                                              | toluene                                       | 50        | >99       | 66.7                                | 14        |
| 16    | JUC-566 (5)                       | NaNO <sub>2</sub> , DBDMH, O <sub>2</sub> , 0.15 h                                           | AcOH                                          | 25        | >99       | 132                                 | 15        |
| 17    | TEMPO-CMP-4 (5)                   | NaNO <sub>2</sub> , DBDMH, O <sub>2</sub> , 0.5 h                                            | AcOH                                          | 25        | >99       | 40                                  | 16        |

<sup>a</sup> Turnover frequency: yield of Benzyl alcohol (mmol) per [TEMPO content (mmol) × reaction time (h)], We assume that all of the TEMPO sites participated in the reaction.

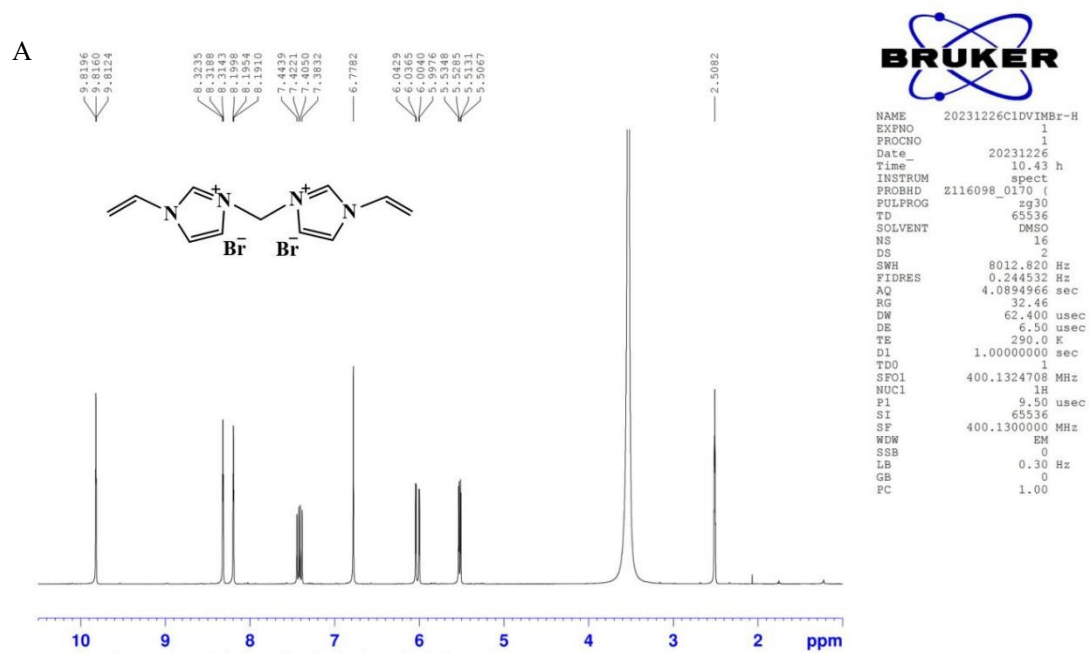

$^1\text{H}$  NMR (400 MHz, DMSO- $\text{D}_6$ )  $\delta$  (ppm): 9.81 (t, 1H), 8.31(t, 1H), 8.19(t, 1H), 7.42(q, 1H), 6.77(s, 1H), 6.03(q, 1H), 5.52(q, 1H).

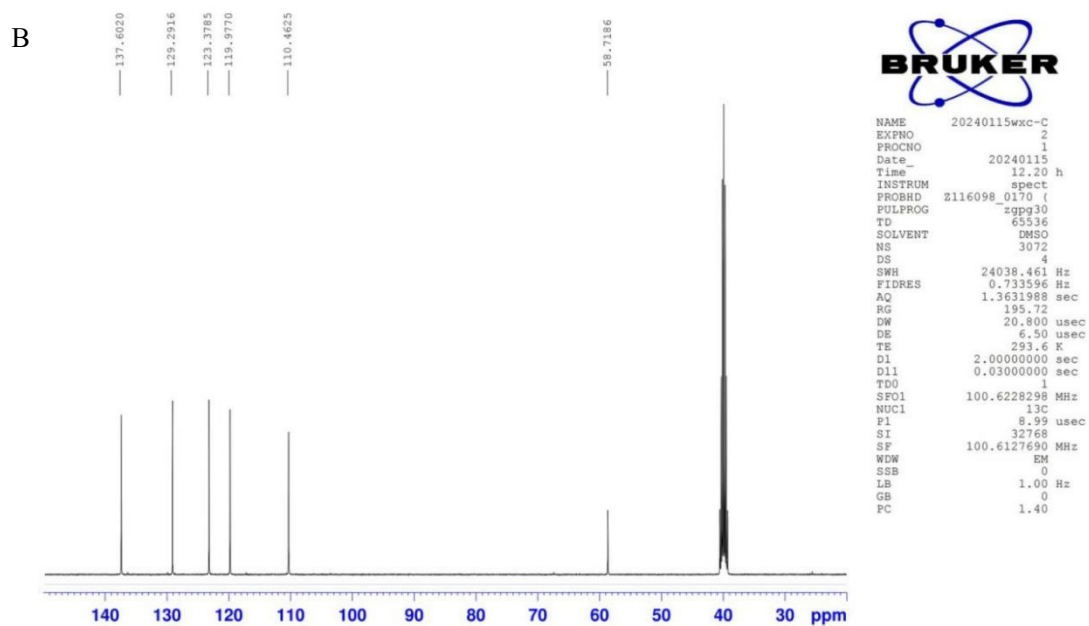

$^{13}\text{C}$  NMR (100 MHz, DMSO- $\text{D}_6$ )  $\delta$  (ppm): 137.6, 129.3, 123.4, 120.0, 110.5, 58.7.

**Fig. S15** (A)  $^1\text{H}$  NMR and (B)  $^{13}\text{C}$  NMR of  $[\text{C}_1\text{DVIM}]\text{Br}$  using DMSO as the solvent.

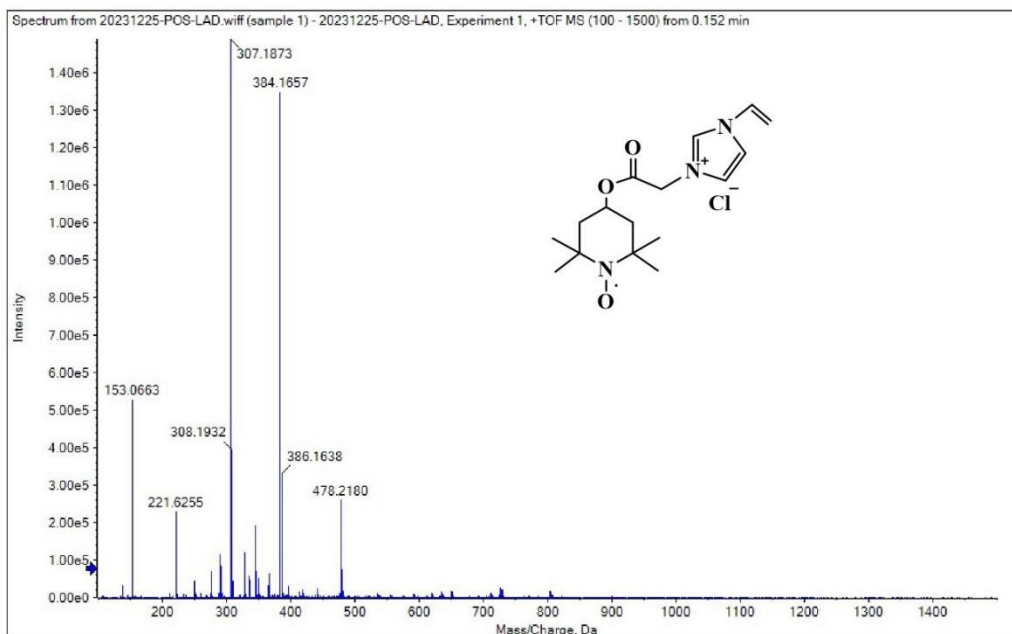

**Fig. S16** MS spectrum of the TEMPO-IL-Cl, MALDI-TOF-MS:  $m/z$ : 307.1873,  $[M-Cl]^+=307.39$ , Calculated value: 342.84.

### GC Chromatographs of the Reaction Products

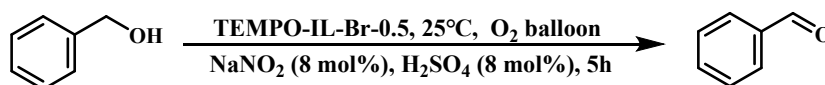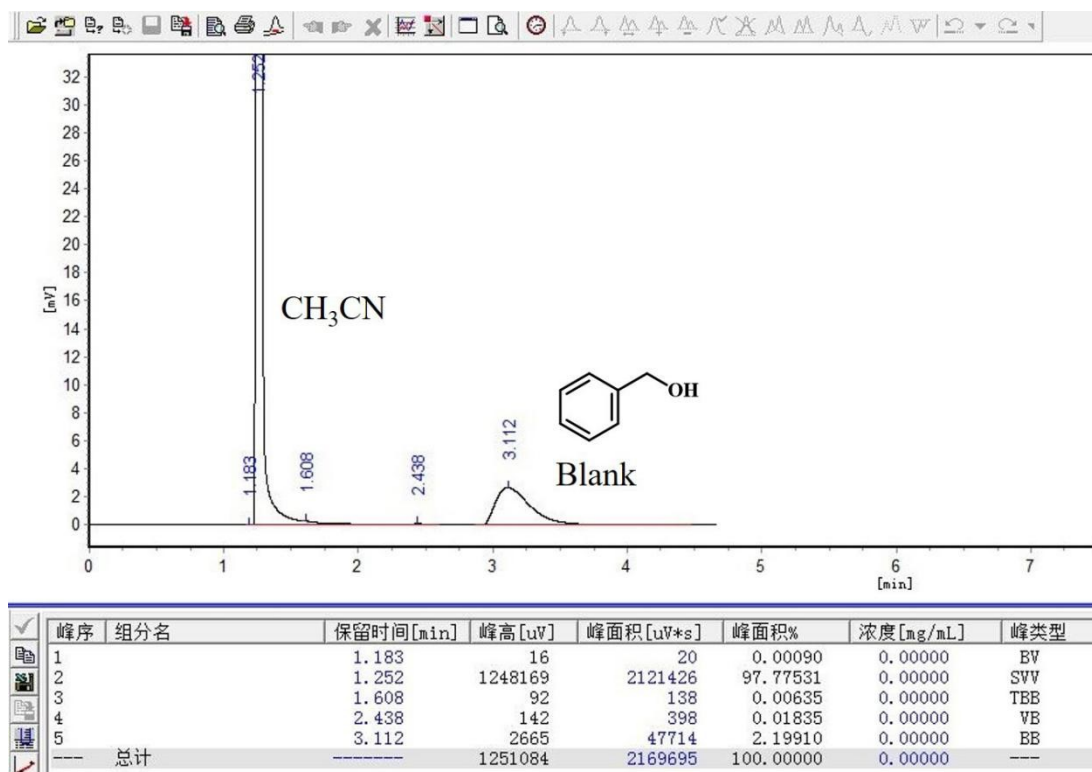

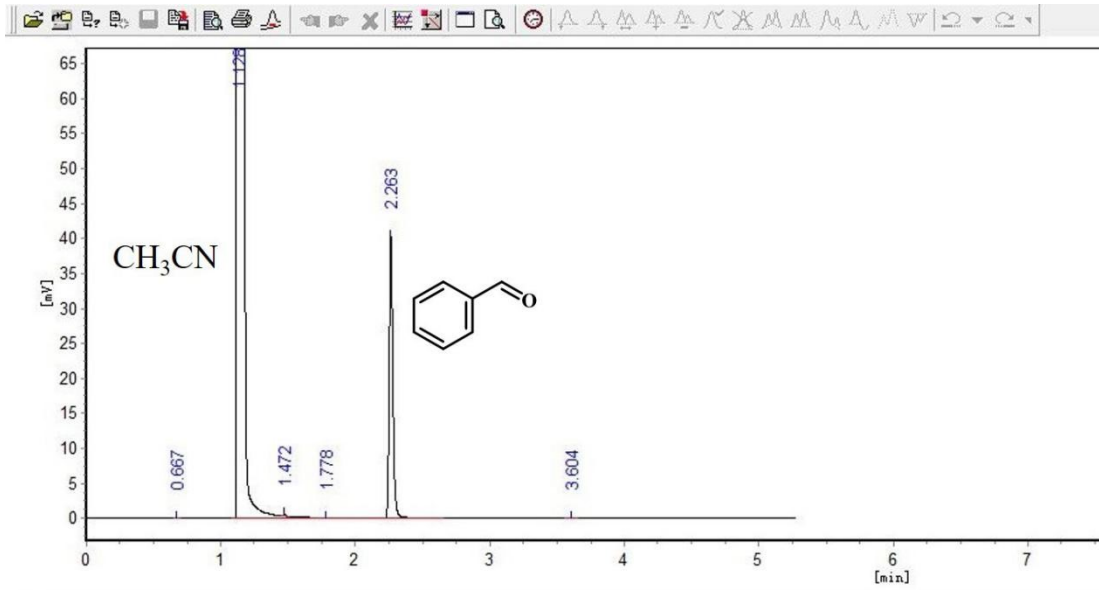

| 峰序 | 组分名 | 保留时间[min] | 峰高[uV]  | 峰面积[uV*s] | 峰面积%      | 浓度[mg/mL] | 峰类型 |
|----|-----|-----------|---------|-----------|-----------|-----------|-----|
| 1  |     | 0.667     | 70      | 74        | 0.00316   | 0.00000   | BB  |
| 2  |     | 1.128     | 1248147 | 2273036   | 96.73940  | 0.00000   | SBV |
| 3  |     | 1.472     | 169     | 214       | 0.00911   | 0.00000   | TBB |
| 4  |     | 1.778     | 12      | 15        | 0.00065   | 0.00000   | TBB |
| 5  |     | 2.263     | 40253   | 76265     | 3.24578   | 0.00000   | VB  |
| 6  |     | 3.604     | 16      | 45        | 0.00190   | 0.00000   | BB  |
| 总计 |     |           | 1288667 | 2349649   | 100.00000 | 0.00000   | --- |

## Supplementary References

- 1 L. Li, R. Matsuda, I. Tanaka, H. Sato, P. Kanoo, H. J. Jeon, M. L. Foo, A. Wakamiya, Y. Murata and S. Kitagawa, *J. Am. Chem. Soc.*, 2014, **136**, 7543–7546.
- 2 M. Benaglia, A. Puglisi, O. Holczknecht, S. Quici and G. Pozzi, *Tetrahedron*, 2005, **61**, 12058–12064.
- 3 A. J. Shakir, C. Paraschivescu, M. Matache, M. Tudose, A. Mischie, F. Spafiu and P. Ionita, *Tetrahedron Lett.*, 2015, **56**, 6878–6881.
- 4 L. Wang, Z. Bie, S. Shang, G. Li, J. Niu and S. Gao, *ChemistrySelect*, 2018, **3**, 3386–3390.
- 5 K. M. Zwoliński and M. J. Chmielewski, *ACS Appl. Mater. Interfaces*, 2017, **9**, 33956–33967.
- 6 J. L. Zhuang, X. Y. Liu, Y. Zhang, C. Wang, H. L. Mao, J. Guo, X. Du, S. Bin Zhu, B. Ren and A. Terfort, *ACS Appl. Mater. Interfaces*, 2019, **11**, 3034–3043.
- 7 A. J. Shakir, D. C. Culita, J. Calderon-Moreno, A. Musuc, O. Carp, G. Ionita and P. Ionita, *Carbon N. Y.*, 2016, **105**, 607–614.
- 8 Y. M. Shen, Y. Xue, M. Yan, H. L. Mao, H. Cheng, Z. Chen, Z. W. Sui, S. Bin Zhu, X. J. Yu and J. L. Zhuang, *Chem. Commun.*, 2021, **57**, 907–910.
- 9 J. Zhu, P. C. Wang and M. Lu, *RSC Adv.*, 2012, **2**, 8265–8268.
- 10 W. Zhang, Y. Zhang, W. Cai, D. Wang and S. Zhang, *J. Appl. Polym. Sci.*, 2024, **141**, 1–10.
- 11 B. Wang, J. Zhang, Y. Xue, Y. Chong, D. Zhao, H. Cheng, L. Tian and J. Zhuang, *Molecules*, , DOI:10.3390/molecules28020593.
- 12 B. Karimi and E. Badreh, *Org. Biomol. Chem.*, 2011, **9**, 4194–4198.
- 13 B. Karimi, B. Ghaffari and H. Vali, *J. Colloid Interface Sci.*, 2021, **589**, 474–485.
- 14 B. Karimi, S. Vahdati and H. Vali, *RSC Adv.*, 2016, **6**, 63717–63723.
- 15 F. Chen, X. Guan, H. Li, J. Ding, L. Zhu, B. Tang, V. Valtchev, Y. Yan, S. Qiu and Q. Fang, *Angew. Chemie*, 2021, **133**, 22404–22409.
- 16 M. Liu, B. Zhou, L. Zhou, Z. Xie, S. Li and L. Chen, *J. Mater. Chem. A*, 2018, **6**, 9860–9865.
